# Supplementary material
Source: PubMed Central journal article supplement (PMC1047086)

## A Promoter-Expression-Motif-Interactions

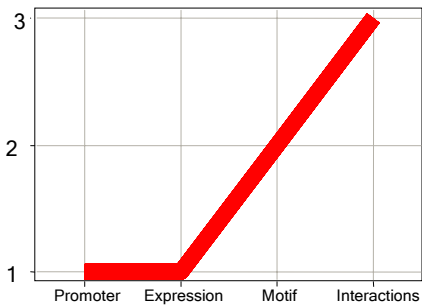

$$P_1^4 E_1^4 M_2^4 I_3^4$$

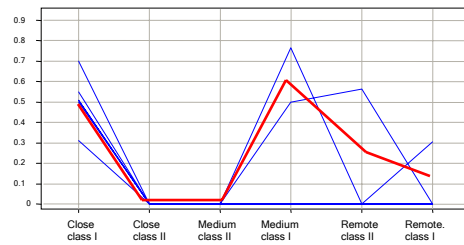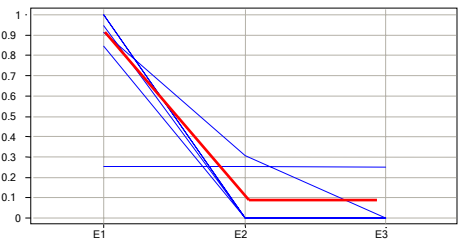

slyB  
ybcU  
yhiW  
mgtA

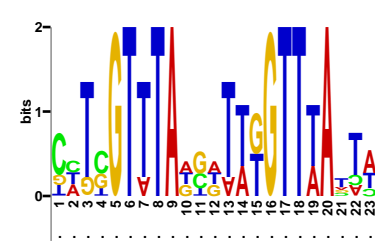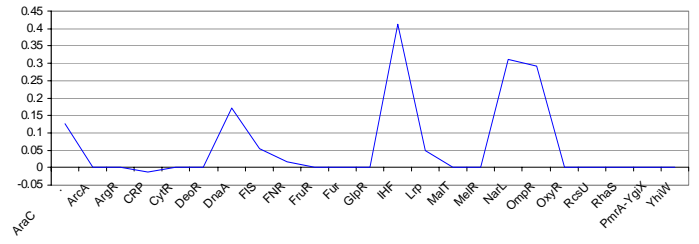

## B Promoter-Interactions-Orientation

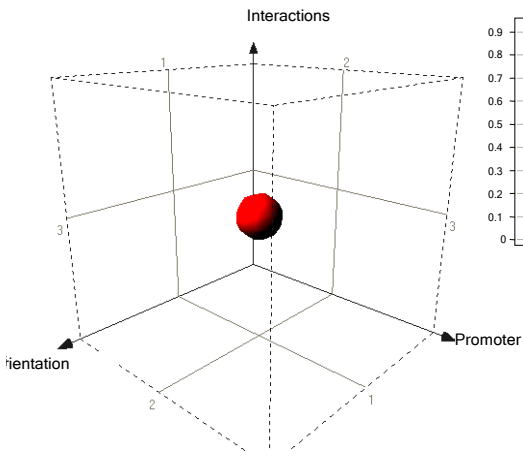

$$P_2^3 I_3^3 O_1^3$$

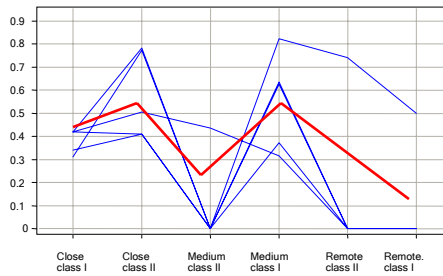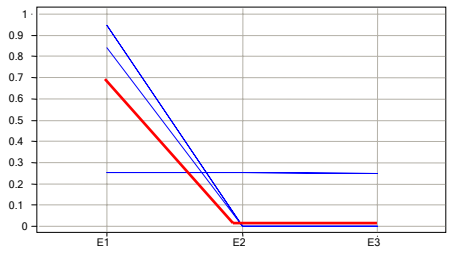

ybjX  
pipD  
ugtL  
ompT

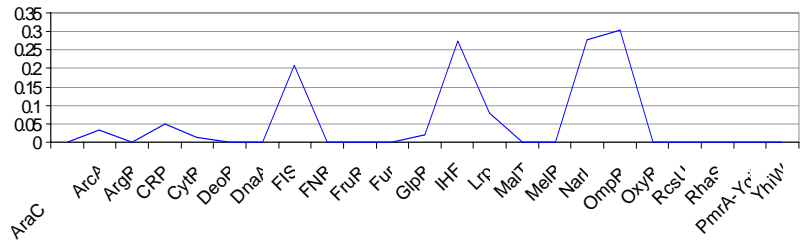

Supplement: pnas_102_8_2862__4.pdf [file pnas_102_8_2862__4.pdf]
