# Supplementary material
Source: PubMed Central journal article supplement (PMC1047086)

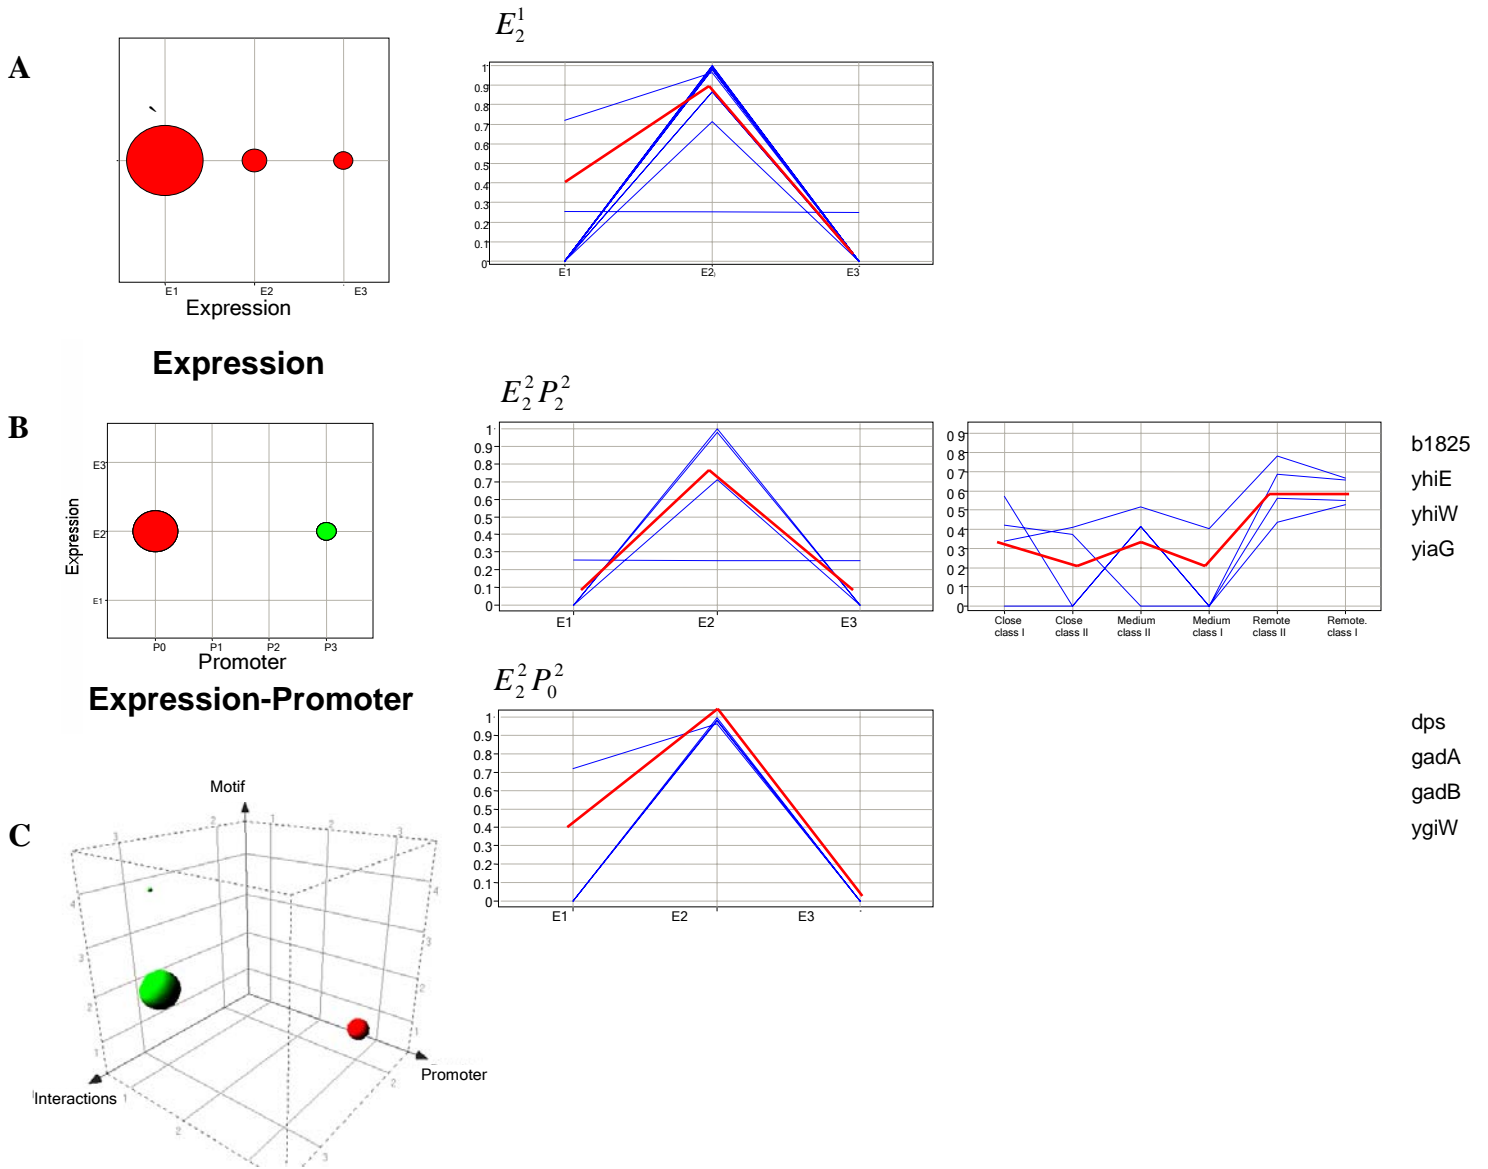

b1825  
yhiE  
yhiW  
yiaG

dps  
gadA  
gadB  
ygiW

**Motifs-Promoter-Interactions**

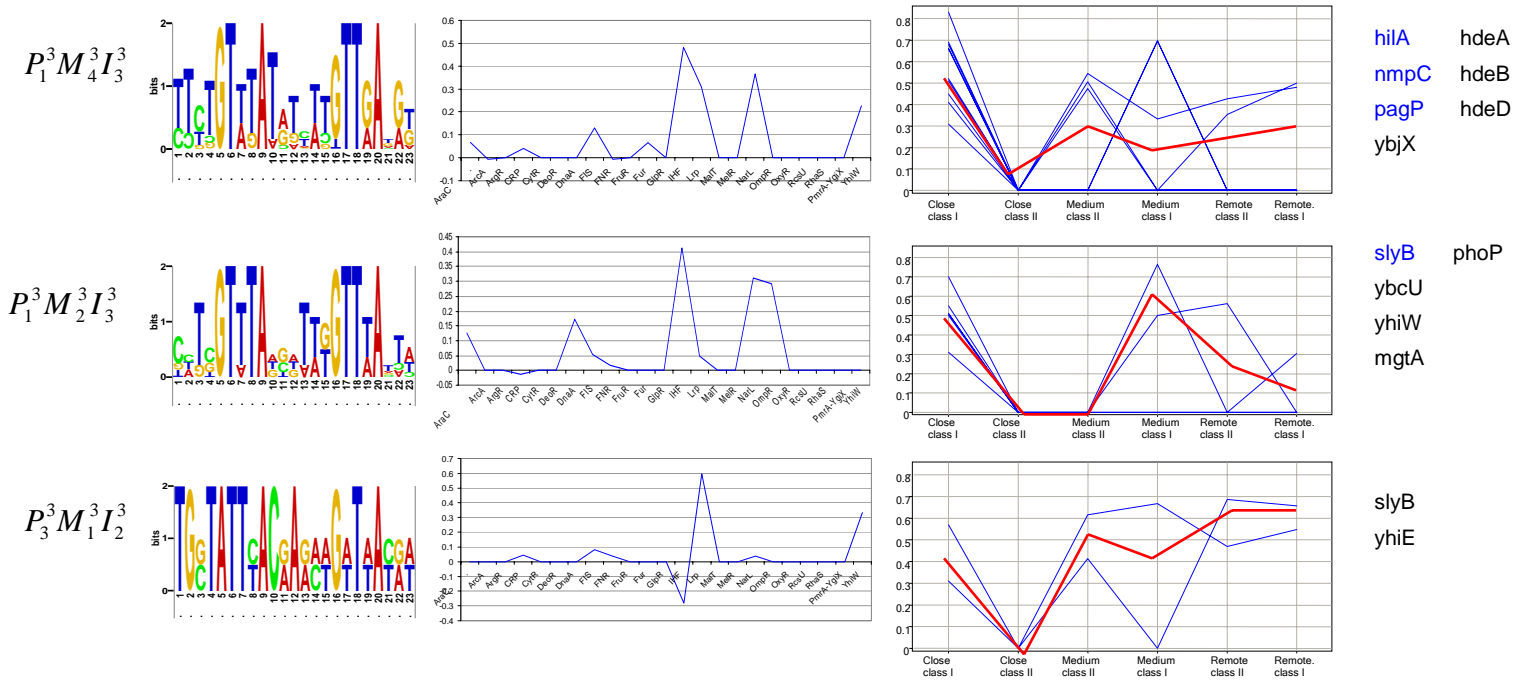

Supplement: pnas_102_8_2862__5.pdf [file pnas_102_8_2862__5.pdf]
